# Supplementary material for: Biogenic Silver Nanoparticles Conjugated with Nisin: Improving the Antimicrobial and Antibiofilm Properties of Nanomaterials
Source: MDPI journal article supplement (doi:10.3390/chemistry3040092), 2021-11-04
Supplement: s1 [file s1]

# Supplementary Material for Biogenic Silver Nanoparticles Conjugated with Nisin: Improving the Antimicrobial and Antibiofilm Properties of Nanomaterials

Patricia Zimet <sup>1</sup>, Ruby Valadez <sup>2,3</sup>, Sofia Raffaelli <sup>2</sup>, María Belén Estevez <sup>2</sup>, Helena Pardo <sup>1</sup> and Silvana Alborés <sup>2,\*</sup>

<sup>1</sup> Centro NanoMat, Instituto Polo Tecnológico de Pando, DETEMA, Facultad de Química, Universidad de la República, Montevideo 11800, Uruguay; pzimet@fq.edu.uy (P.Z.); hpardo@fq.edu.uy (H.P.)

<sup>2</sup> Área de Microbiología, Departamento de Biociencias, Facultad de Química, Universidad de la República, Montevideo, 11800, Uruguay; 15030688@itcelaya.edu.mx (R.V.); sraffaelli@fq.edu.uy (S.R.); bestevez@fq.edu.uy (M.B.E.)

<sup>3</sup> Tecnológico Nacional de México en Celaya, Guanajuato 38010, Mexico

\* Correspondence: salbores@fq.edu.uy; Tel.: +598 29244209

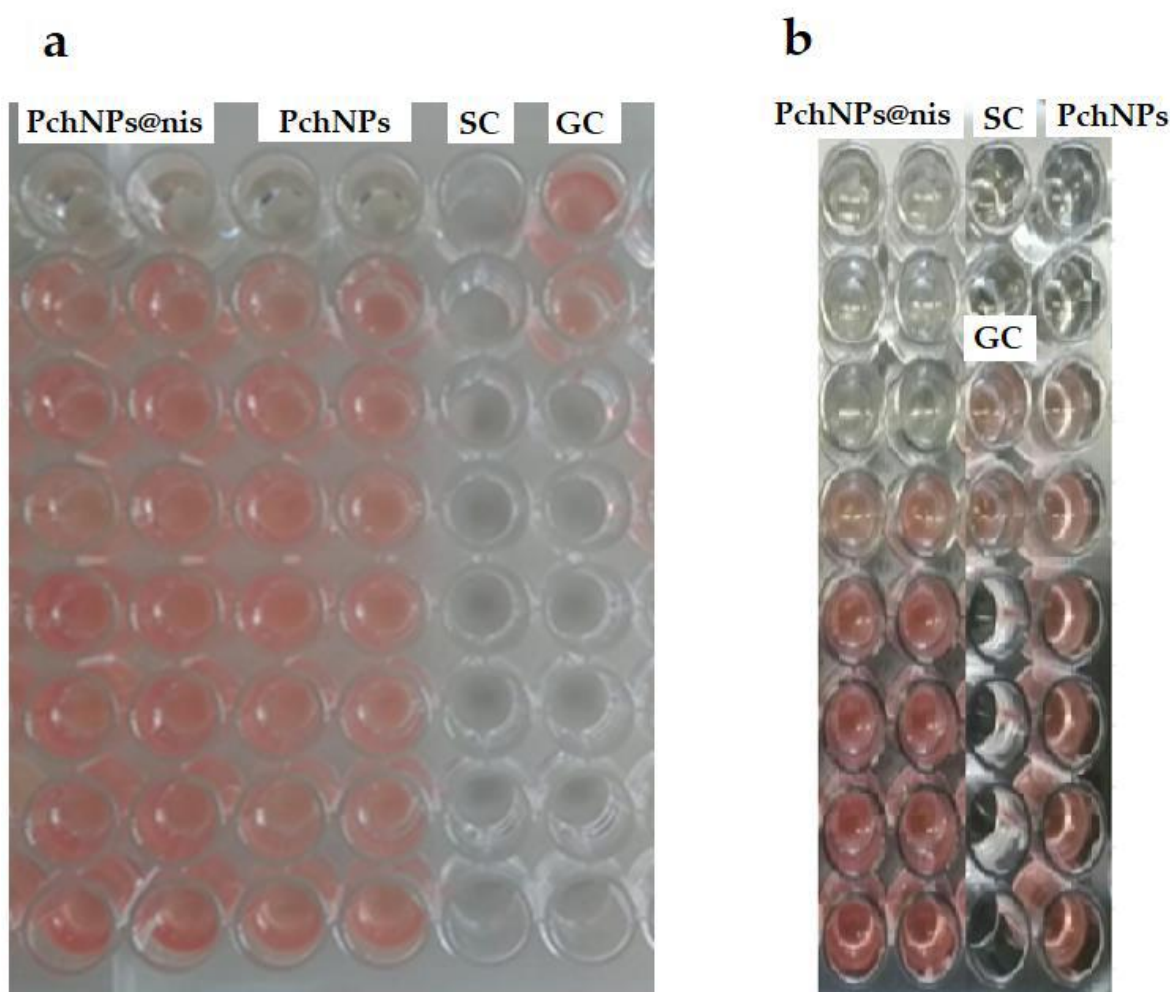

**Figure S1.** Determination of Minimal Inhibitory Concentration against *E. coli* (a) and *S. aureus* (b). Staining: TTC (triphenyl-tetrazolium chloride). SC: sterile control. GC: growth control .
